# Supplementary material for: ELIXIR biovalidator for semantic validation of life science metadata
Source: PubMed Central journal article supplement (PMC9154242; doi:10.1093/bioinformatics/btac195), 2022-04-05
Supplement: btac195_supplementary_data.pdf [file btac195_supplementary_data.pdf]

## Supplementary Material

### BrAPI2BioSamples

Manual ENA submissions are only possible through the API with existing, presubmitted BioSamples IDs. The [BrAPI2BioSamples](#) Python command line tool does that presubmission by (i) extracting Biosample metadata from a BrAPI endpoint before (ii) submitting the metadata using the Biosamples API and (iii) giving back the list of Biosamples ID with corresponding BrAPI ID. The tool can be installed using the python package manager pip:

```
pip install brapi2biosamples
```

The BrAPI endpoint is required to have the following calls implemented:

- /trials/{trialDbId}
- /studies/{studyDbId}/germplasm
- /germplasm/{germplasmDbId}

The BrAPI2BioSamples tool allows submissions of samples from phenotyping platforms containing the metadata to BioSamples, ensuring samples are MIAPPE-compliant. The tool can also be used to update existing samples in BioSamples to provide additional metadata. When metadata is not available on the BrAPI endpoint, it can be injected using a supplementary metadata yaml file. Upon first use it is recommended to run the script in draft mode to check that all the data is parsed correctly; later on a submission can be done on the dev instance or the production instance of Biosamples.

Here is the minimal command to use the tool:

```
brapi2biosamples -t 1 -e "https://pipa.psb.ugent.be/BrAPIPPA/brapi/v1" -D --draft "self.pippa_submission"
```

The explanation of these parameters and options are given below:

| Option          | Description                                                                                   | Required |
|-----------------|-----------------------------------------------------------------------------------------------|----------|
| -v, --version   | Print version number                                                                          |          |
| -t, --trialDbId | The identifier of a trial                                                                     | yes      |
| -e, --endpoint  | The URL towards the BrAPI endpoint, not ending with /                                         | yes      |
| -d, --date      | The date of sample publication<br>(example:2021-01-20T17:05:13Z)                              |          |
| -D, --domain    | The domain of your ENA account                                                                | yes      |
| --draft         | When this flag is given, the samples will not be submitted to BioSamples but exported as JSON |          |
| --dev           | When this flag is given, the samples will be submitted                                        |          |

|            |                                                                                                                  |  |
|------------|------------------------------------------------------------------------------------------------------------------|--|
|            | to the dev instance of BioSamples                                                                                |  |
| --secret   | Path to a secret.yml file to deliver the BioSample credentials                                                   |  |
| --update   | Path to a tsv file to update submissions                                                                         |  |
| --info     | Path to a info.yml file to deliver the extra attributes                                                          |  |
| --output   | Path to a directory where the JSON files are written to.                                                         |  |
| -h, --help | Show this message and exit.                                                                                      |  |
| --rename   | If the "germplasmDbId" is source specific, reconstruct the name with "genus, instituteName and accessionNumber". |  |
| --decode   | Specify the fields that need to be decoded by base64, split by comma. ex -c "field 1, field 2"                   |  |

The output is a tab separated file with two columns: germplasmDbId and the Biosamples accession number. This allows traceback of the submitted samples. This tab separated file can also be used to update the samples later on if needed.

This tool was used to successfully submit and validate around 500 maize samples from the PIPPA phenotyping platform to BioSamples.

### Testing ELIXIR biovalidator deployed at EBI BioSamples

The ELIXIR biovalidator is deployed at EBI BioSamples for sample validation. The `/validate` endpoint can be used to validate given JSON data against JSON Schema.`

Following is an example request to validate whether the disease\_id field in a given JSON document is a subclass of MONDO:0000001 or PATO:0000461. In the example we pass a invalid ontology term for the disease\_id field and get a validation error message.

**Request URL:** http://localhost:3020/validate

**Request Method:** POST

**Content-Type:** application/json; charset=utf-8

**Payload:**

```
{
  "schema": {
    "$schema": "http://json-schema.org/draft-07/schema#",
    "type": "object",
    "properties": {
      "disease": {
        "description": "The disease for the sample species.",
        "type": "string"
      },
      "disease_id": {
        "description": "The ontology id for the disease sample species.",
        "type": "string",
```

```
    "graph_restriction": {
      "ontologies": ["obo:mondo", "obo:efo"],
      "classes": ["MONDO:0000001", "PATO:0000461"],
      "relations": ["rdfs:subClassOf"],
      "direct": false,
      "include_self": true
    }
  },
  "required": ["disease"]
},
"object": {
  "alias": "MA456",
  "taxonId": 9606,
  "disease": "glioblastoma",
  "disease_id": "EFO:0000519"
}
}
```

**Response:** [{"dataPath": "/disease\_id", "errors": ["Provided term is not child of [http://purl.obolibrary.org/obo/MONDO\_0000001, http://purl.obolibrary.org/obo/PATO\_0000461]"]}]]
